# Supplementary material
Source: MDPI journal article supplement (https://www.mdpi.com/2073-4441/15/10/1944)
Supplement: s1 [file s1]

*Article*

# Real-Time Pyrolysis Dynamics of Thermally Aged Tire Microplastics by TGA-FTIR-GC/MS

Guangteng Bai <sup>1,2,3</sup>, Juyang Fu <sup>2</sup>, Qian Zhou <sup>2,\*</sup> and Xiangliang Pan <sup>1,2,\*</sup>

<sup>1</sup> Xinjiang Key Laboratory of Environmental Pollution and Bioremediation, Xinjiang Institute of Ecology and Geography Chinese Academy of Sciences, Urumqi 830011, China

<sup>2</sup> Key Laboratory of Microbial Technology for Industrial Pollution Control of Zhejiang Province, College of Environment, Zhejiang University of Technology, Hangzhou 310014, China

<sup>3</sup> University of Chinese Academy of Sciences, Beijing 100049, China

\* Correspondence: qianzhou@zjut.edu.cn (Q.Z.); panxl@zjut.edu.cn (X.P.)

**Text S1.** The morphologies of WTPs with different thermal-oxidative aging conditions showed a significant change. As shown in Figure S1, the original WTP particles exhibited a smooth surface and neat edges, and their corners were relatively clear. However, the aged WTPs under Aging I and Aging II exhibited a rough surface and edges. Their shape was more irregular and curlier than that of the original particles.

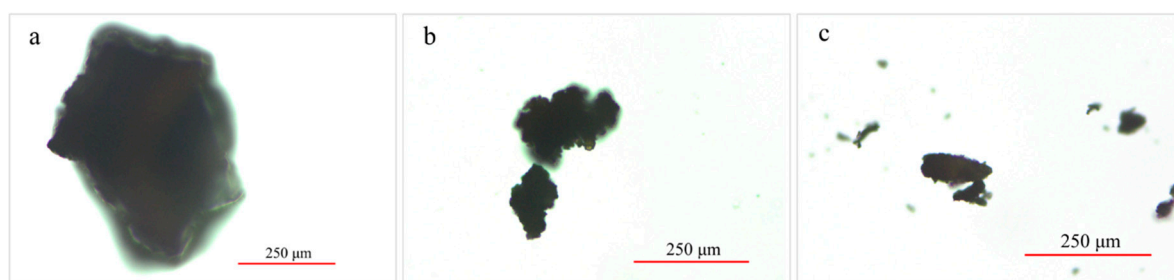

**Figure S1** Morphologies of WTPs with different thermal-oxidative aging time (a, original WTPs; b, aged WTPs under Aging I; c, aged WTPs under Aging II)

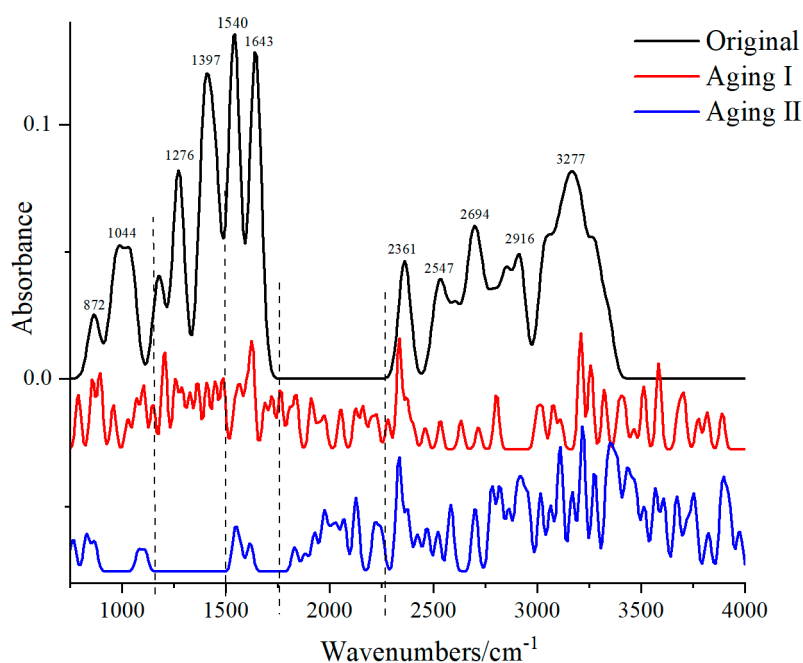

**Figure S2** Changes in ART-FTIR spectra of WTPs with different thermal aging time

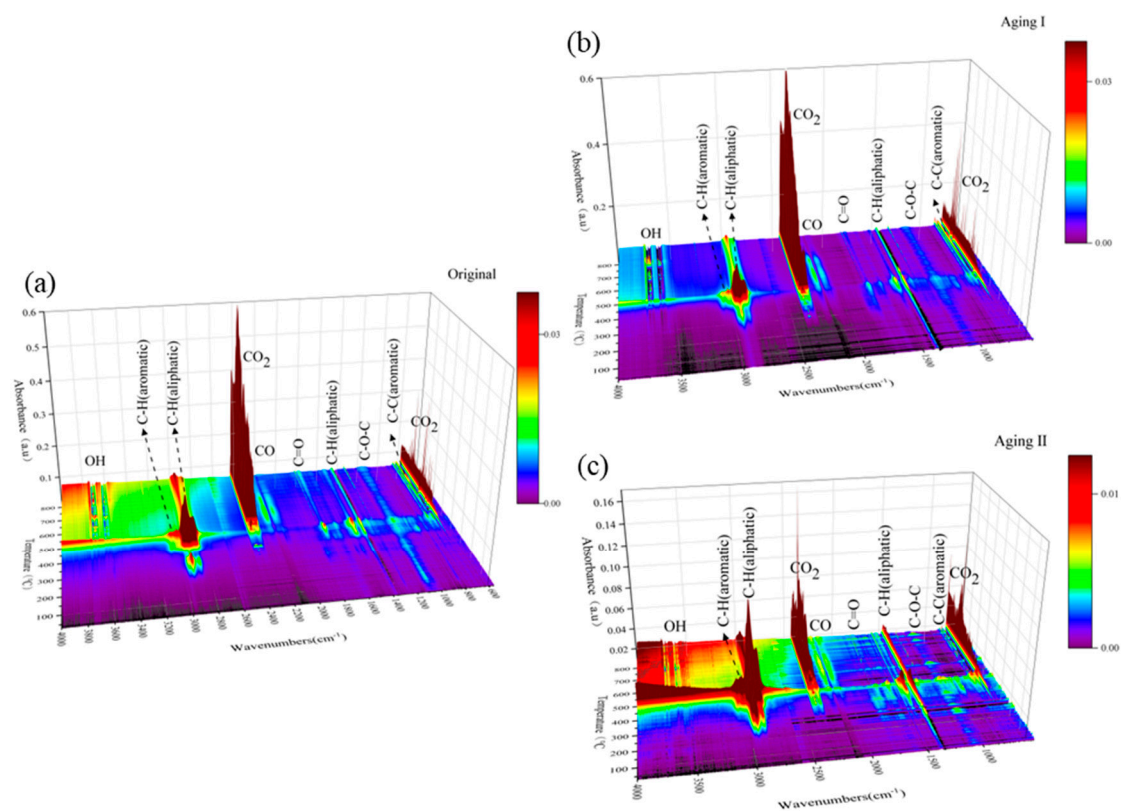

**Figure S3** 3D FTIR spectra of pyrolysis products of WTPs in original stage (a), aging I (b) and aging II (c).

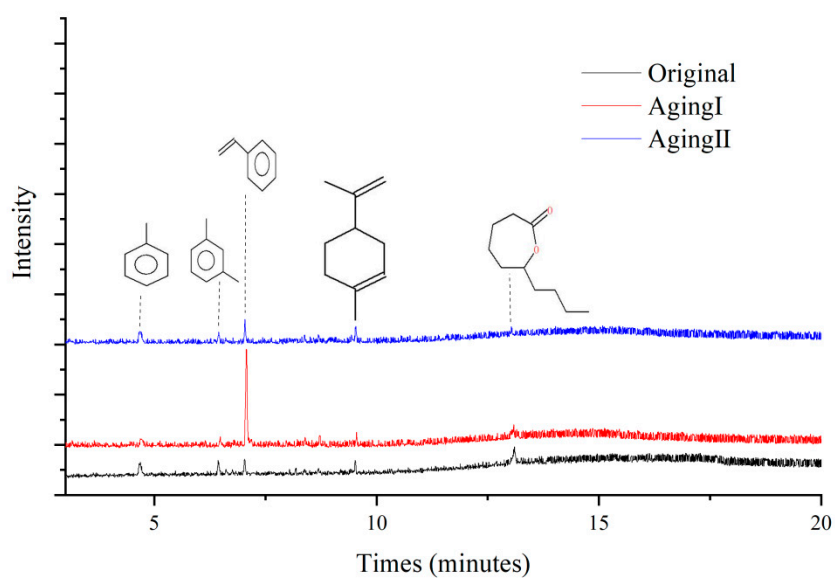

**Figure S4** Pyrochromatograph detection of volatile products at 484 °C.

**Table S1** Characteristic IR absorption bands and functional groups of tires.

| Functional group | Peak/cm <sup>-1</sup> | Products           | Vibration  |
|------------------|-----------------------|--------------------|------------|
| C-H              | 2960                  | aliphatic compound | Stretching |
|                  | 2932                  |                    | Stretching |
|                  | 2874                  |                    | Stretching |
|                  | 1459                  |                    | Bending    |
|                  | 1380                  |                    | Bending    |
| C-H              | 3067                  | aromatic compound  | Stretching |
|                  | 750                   |                    | Bending    |
| C-C              | 700                   |                    | Bending    |
| C=O              | 1715                  |                    | Stretching |
| C-O              | 1250                  |                    | Bending    |
| C-H              | 3014                  | CH <sub>4</sub>    | Stretching |
| O=C=O            | 2350                  | CO <sub>2</sub>    | Stretching |
|                  | 668                   |                    | Bending    |
|                  | 2184                  | CO                 | Stretching |
| C=C              | 1600                  | benzene ring       | Stretching |
| C-O-C            | 1085                  |                    | Stretching |
| C=C              | 905                   | alkene             | Bending    |
| C-H              | 893                   |                    | Stretching |
